# Supplementary material
Source: Elsevier journal article supplement (https://www.sciencedirect.com/science/article/pii/S1695403316301989)
Supplement: mmc1 [file S1695403316301989:mmc1.pdf]

21/12/2015

Estudio sobre el nivel de formación sobre Trastornos del Espectro Autista entre peditras de atención hospitalaria.

## Estudio sobre el nivel de formación sobre Trastornos del Espectro Autista entre peditras de atención hospitalaria.

### CUESTIONARIO "SD-TEA" (Variables socio-demográficas de los peditras participantes)

#### 1. Grupo de edad

Por favor señale la opción adecuada en su caso  
Marca solo un óvalo.

- ☐ 20-29 años  
☐ 30-39 años  
☐ 40-49 años  
☐ De 50 en adelante

#### 2. Género

Marca solo un óvalo.

- ☐ Femenino  
☐ Masculino

#### 3. Área de especialidad

Marca solo un óvalo.

- ☐ Residente de pediatría  
☐ Adjunto de Pediatría general  
☐ Adjunto de Neurología Infantil  
☐ Adjunto de otra sub-especialidad pediátrica

#### 4. Número de años de experiencia en Pediatría

Marca solo un óvalo.

- ☐ 1-5 años  
☐ 6-10 años  
☐ 11-15 años  
☐ 16-19 años  
☐ 20 años o más

<https://docs.google.com/forms/d/10W0tAHqy5%kda7NZoHudf0Rb5oAxtU1Bhg9ng-OyA/edit>

1/7

21/12/2015

Estudio sobre el nivel de formación sobre Trastornos del Espectro Autista entre peditras de atención hospitalaria.

### 10. 3) Limitación de muestras espontáneas de emoción a la hora de compartir intereses, actividades o juego con otras personas

Marca solo un óvalo.

- ☐ No lo sé  
☐ Si  
☐ No

### 11. 4) Limitación en empatía emocional o social

Marca solo un óvalo.

- ☐ No lo sé  
☐ Si  
☐ No

### 12. 5) Dificultad para adaptar la conducta a varios contextos sociales.

Marca solo un óvalo.

- ☐ No lo sé  
☐ Si  
☐ No

### 13. 6) Impresión de que el niño pueda tener problemas de audición o visión.

Marca solo un óvalo.

- ☐ No lo sé  
☐ Si  
☐ No

### 14. 7) Falta de interés en el medio que lo rodea

Marca solo un óvalo.

- ☐ No lo sé  
☐ Si  
☐ No

### 15. 8) Dificultades para compartir un juego imaginativo

Marca solo un óvalo.

- ☐ No lo sé  
☐ Si  
☐ No

### 16. 9) Ausencia de lenguaje en todos los casos

Marca solo un óvalo.

- ☐ No lo sé  
☐ Si  
☐ No

<https://docs.google.com/forms/d/10W0tAHqy5%kda7NZoHudf0Rb5oAxtU1Bhg9ng-OyA/edit>

3/7

21/12/2015

Estudio sobre el nivel de formación sobre Trastornos del Espectro Autista entre peditras de atención hospitalaria.

### 5. ¿Ha tenido usted experiencias previas trabajando con pacientes TEA?

Marca solo un óvalo.

- ☐ Si  
☐ No

### 6. En los últimos 6 meses, ¿Cuántos pacientes con TEA puede haber atendido aproximadamente?

Marca solo un óvalo.

- ☐ Ninguno  
☐ Menos o igual a 10 pacientes  
☐ Más de 10 pacientes

### 7. Escriba el nombre del hospital donde trabaja

.....

### CUESTIONARIO "CFTEA" (Nivel de formación de peditras hospitalarios sobre Trastornos del Espectro Autista)

Por favor, no consulte ningún material de apoyo para responder las siguientes preguntas.  
Gracias por su tiempo

### Los siguientes comportamientos describen de una forma precisa a un paciente con TEA:

Dominio 1:

### 8. 1) Alteración marcada en el uso de la comunicación no-verbal, tal como: anomalías en el contacto visual, en el lenguaje corporal o expresión facial durante la interacción social

Marca solo un óvalo.

- ☐ No lo sé  
☐ Si  
☐ No

### 9. 2) Fallo en el desarrollo de interacciones sociales adecuadas para su edad con sus iguales:

Marca solo un óvalo.

- ☐ No lo sé  
☐ Si  
☐ No

<https://docs.google.com/forms/d/10W0tAHqy5%kda7NZoHudf0Rb5oAxtU1Bhg9ng-OyA/edit>

2/7

21/12/2015

Estudio sobre el nivel de formación sobre Trastornos del Espectro Autista entre peditras de atención hospitalaria.

Dominio 2:

### 17. 1) Movimientos estereotipados o repetitivos, o uso estereotipado o repetitivo de objetos o del lenguaje (por ejemplo, estereotipias motoras, alinear juguetes, ecolalia...)

Marca solo un óvalo.

- ☐ No lo sé  
☐ Si  
☐ No

### 18. 2) Respuestas aversivas a determinados sonidos o texturas

Marca solo un óvalo.

- ☐ No lo sé  
☐ Si  
☐ No

### 19. 3) Hiper o hiporreactividad a estímulos sensoriales (ruidos, dolor, tacto...etc)

Marca solo un óvalo.

- ☐ No lo sé  
☐ Si  
☐ No

### 20. 4) Intereses muy restringidos, que son anormales por su intensidad o focalización

Marca solo un óvalo.

- ☐ No lo sé  
☐ Si  
☐ No

### 21. 5) Adherencia inflexible a rutinas

Marca solo un óvalo.

- ☐ No lo sé  
☐ Si  
☐ No

Dominio 3:

<https://docs.google.com/forms/d/10W0tAHqy5%kda7NZoHudf0Rb5oAxtU1Bhg9ng-OyA/edit>

4/7
