# Supplementary material
Source: Elsevier journal article supplement (https://www.sciencedirect.com/science/article/pii/S1695403316301989)
Supplement: mmc2 [file S1695403316301989:mmc2.pdf]

Dominio 3:

22. 1) Los síntomas deben estar presentes en estadios precoces del desarrollo aunque pueden no manifestarse hasta que las demandas sociales sean mayores

Marca solo un óvalo.

- ☐ No lo sé  
☐ Sí  
☐ No

23. 2) Los síntomas generan una alteración clínicamente significativa en el funcionamiento social, laboral u otras áreas importantes

Marca solo un óvalo.

- ☐ No lo sé  
☐ Sí  
☐ No

Dominio 4:

24. 1) ¿El autismo es una esquizofrenia infantil?

Marca solo un óvalo.

- ☐ No lo sé  
☐ Sí  
☐ No

25. 2) ¿El autismo es una condición asociada a la vacunación?

Marca solo un óvalo.

- ☐ No lo sé  
☐ Sí  
☐ No

26. 3) ¿El autismo es un trastorno del neurodesarrollo?

Marca solo un óvalo.

- ☐ No lo sé  
☐ Sí  
☐ No

27. 4) ¿Puede el autismo estar asociado con retraso mental?

Marca solo un óvalo.

- ☐ No lo sé  
☐ Sí  
☐ No

28. 5) ¿Puede el autismo estar asociado a epilepsia?

Marca solo un óvalo.

- ☐ No lo sé  
☐ Sí  
☐ No

29. 6) El momento en que se diagnostica TEA a un paciente (de forma precoz o tardía) no es relevante.

Marca solo un óvalo.

- ☐ Cierto  
☐ Falso  
☐ No lo sé

30. 7) El diagnóstico de TEA es básicamente clínico

Marca solo un óvalo.

- ☐ Cierto  
☐ Falso  
☐ No lo sé

## **CUESTIONARIO "OTEA" Opinión sobre formación de los pediatras y sobre la disponibilidad de recursos asistenciales relacionados con pacientes TEA**

Por favor, rellene el siguiente cuestionario con aquella opción que considere acorde a su opinión personal. Gracias por su tiempo.

31. 1) ¿Existe en su zona un adecuado tratamiento multidisciplinar de las necesidades socio-sanitarias de los pacientes TEA y sus familias?

Marca solo un óvalo.

- ☐ Sí  
☐ No  
☐ No lo sé

32. 2) ¿Considera que dispone de suficiente formación o recursos como para poder realizar una detección precoz de TEA?

Marca solo un óvalo.

- ☐ Sí  
☐ No

33. 3) ¿Cómo calificaría sus conocimientos y capacidades sobre TEA, en cuanto a poder atender de una forma correcta a estos pacientes?

Marca solo un óvalo.

- ☐ Deficiente  
☐ Suficiente  
☐ Adecuada

34. 4) ¿La formación sobre TEA debería aumentarse durante la residencia de los pediatras y las actividades de formación de los pediatras adjuntos?

Marca solo un óvalo.

- ☐ Sí  
☐ No

35. 5) ¿De qué forma cree usted que se podría mejorar esta formación preferiblemente? (marque sus dos opciones preferidas)

Selecciona todos los que correspondan.

- ☐ Cursos online  
☐ Cursos presenciales  
☐ Rotaciones por Neurología/Psiquiatría Infantil  
☐ Rotaciones por centros de Atención Temprana  
☐ Protocolos para el cribado/tratamiento de estos pacientes  
☐ Otras

36. 6) ¿Existe un protocolo específico de derivación y seguimiento de los pacientes TEA en su región de trabajo?

Marca solo un óvalo.

- ☐ Sí  
☐ No  
☐ No lo sé
