# Supplementary material
Source: Elsevier journal article supplement (https://www.sciencedirect.com/science/article/pii/S1695403316301989)
Supplement: mmc3 [file S1695403316301989:mmc3.pdf]

**RESPUESTAS CORRECTAS AL CUESTIONARIO CFTEA:**

**Dominio 1:**

- 8) sí
- 9) Sí
- 10) Sí
- 11) Si
- 12) sí
- 13) Si
- 14) Sí
- 15) Si
- 16) No

**Dominio 2:**

- 17) Si
- 18) Si
- 19) Si
- 20) Si
- 21) Si

**Dominio 3:**

- 22) Si
- 23) Si

**Dominio 4:**

- 24) No
- 25) No
- 26) Si
- 27) Si
- 28) Si
- 29) Falso
- 30) Cierto
